# Supplementary material for: Novel Quercetin Derivative of 3,7-Dioleylquercetin Shows Less Toxicity and Highly Potent Tyrosinase Inhibition Activity
Source: MDPI journal article supplement (doi:10.3390/ijms22084264), 2021-04-20
Supplement: s1 [file s1]

## Supplementary Materials

# Novel Quercetin Derivative of 3,7-Dioleoylquercetin Shows Less Toxicity and Highly Potent Tyrosinase Inhibition Activity

Moon-Hee Choi<sup>1</sup>, Seung-Hwa Yang<sup>1</sup>, Da-Song Kim<sup>1</sup>, Nam Doo Kim<sup>2</sup>, Hyun-Jae Shin<sup>1\*</sup> and Kechun Liu<sup>3</sup>

<sup>1</sup> Department of Chemical Engineering, Graduate School of Chosun University, Gwangju 61452, Korea; aamoony1222@naver.com (M.-H.C.); sh556@daum.net (S.-H.Y.); dasong1214@daum.net (D.-S.K.); shinhj@chosun.ac.kr (H.-J.S.)

<sup>2</sup> VORONOI BIO Inc., Incheon 21984, Korea; namdoo@voronoibio.com

<sup>3</sup> Biology Institute, Qilu University of Technology (Shandong Academy of Sciences), Jinan 250103, Shandong Province, China; hliukch@sdaas.org

\* Correspondence: shinhj@chosun.ac.kr; Tel.: +82-62-230-7518

a)

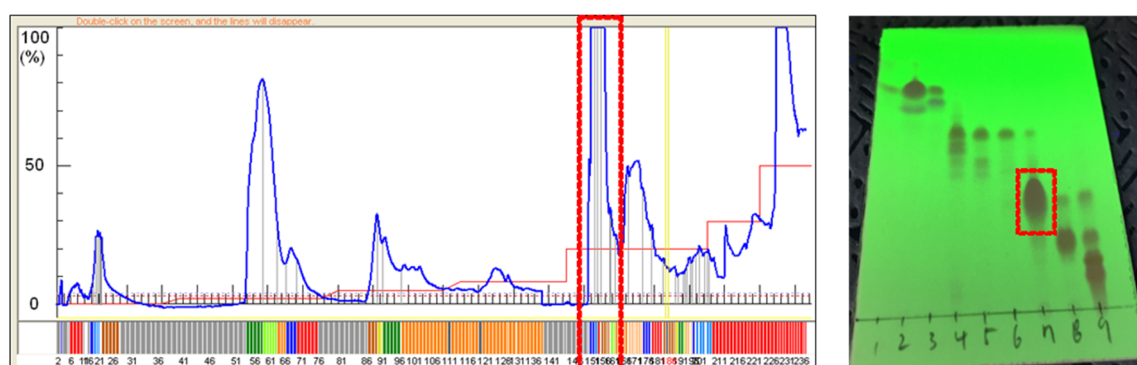

b)

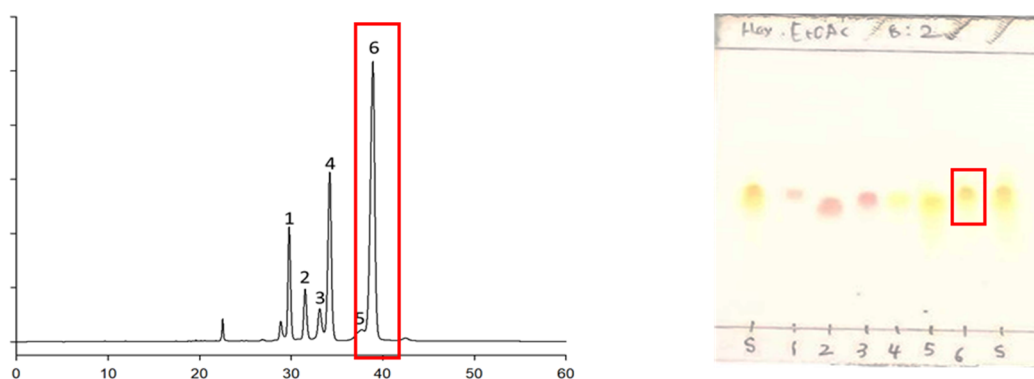

**Figure S1.** a) MPLC (Yamazen) and b) HPLC (Waters) separation, and TLC chromatograms of OQ synthesized and purified in this work. Plate: TLC silica gel 60 F254. Mobile phase: hexane/ethyl acetate mixture (8:2 v/v). OQ was visualized by *p*-anisaldehyde staining (*p*-anisaldehyde/sulfuric acid/ethanol mixture (0.5:0.5:9 v/v)). S, 1 2 3 4 5 6

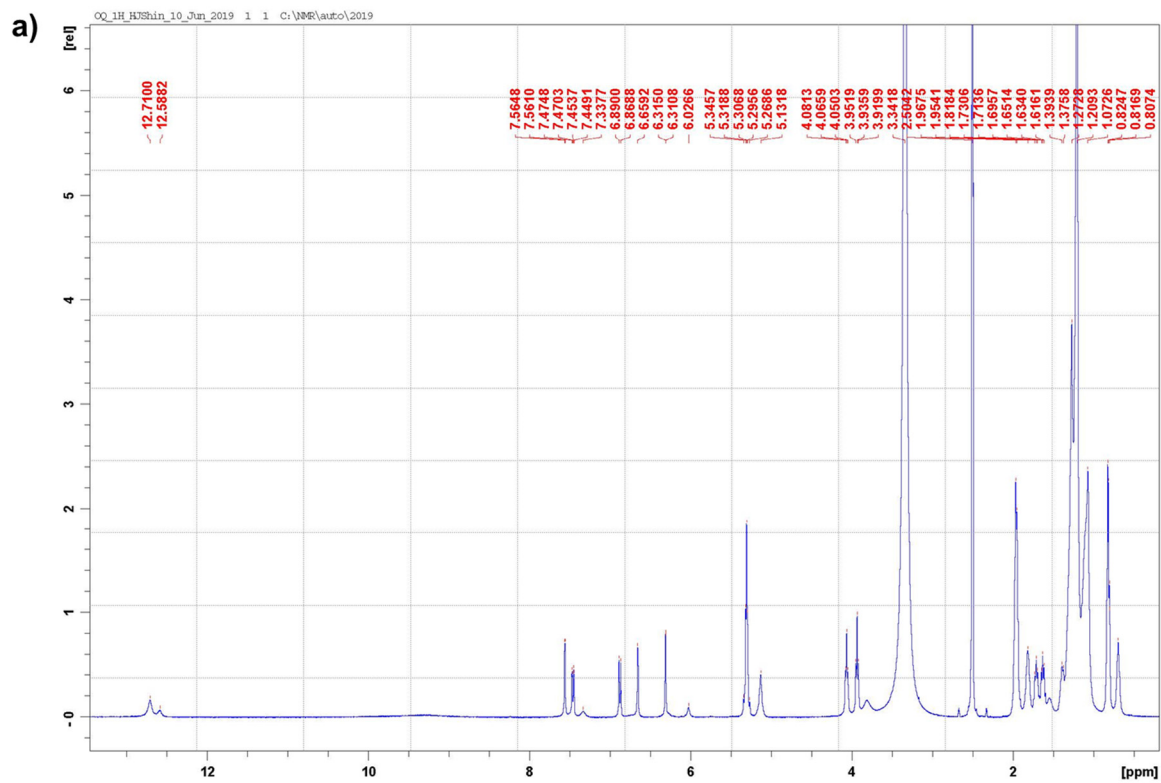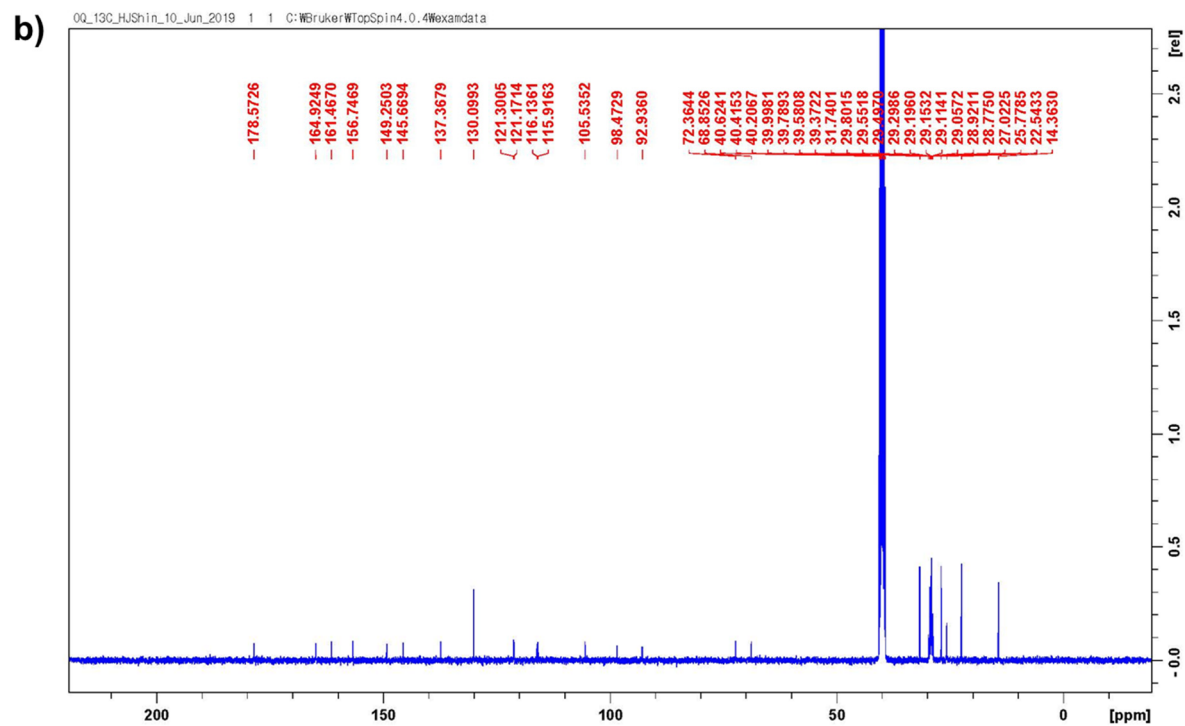

c)

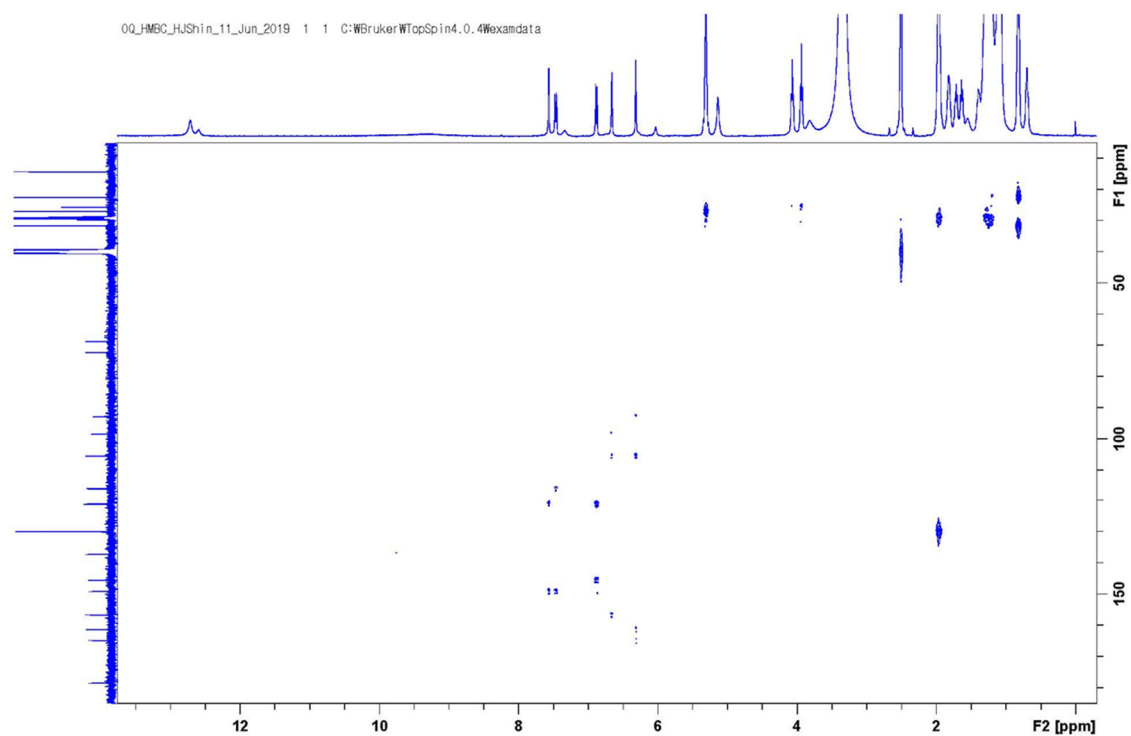

d)

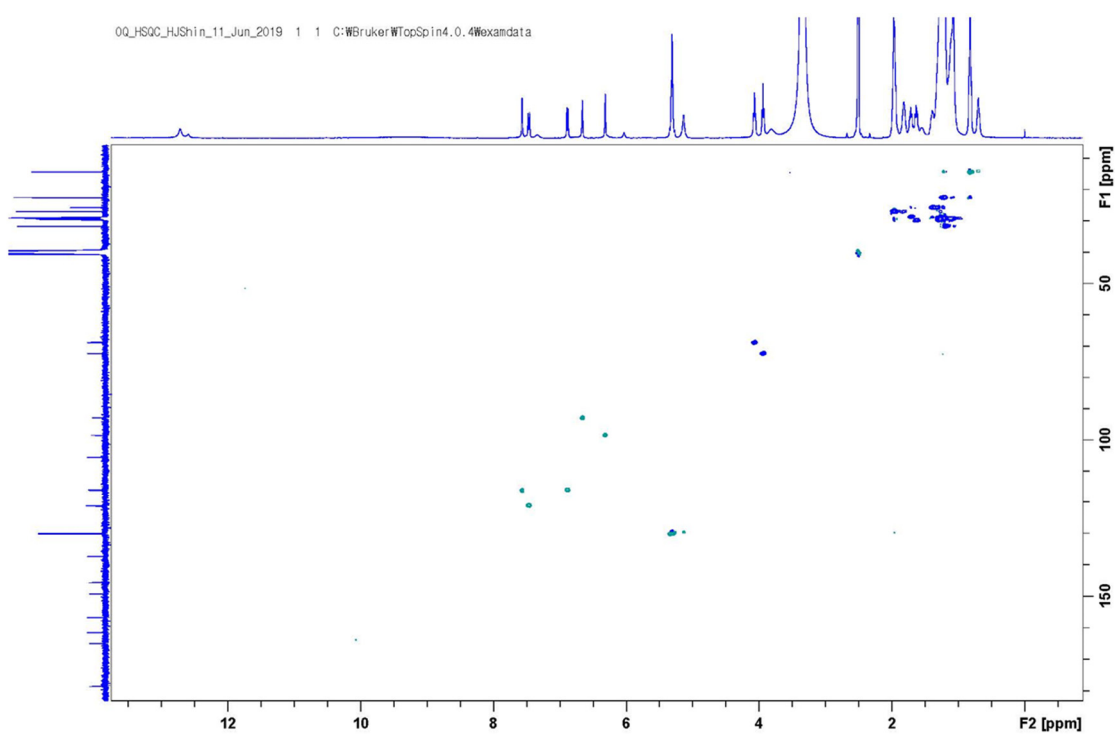

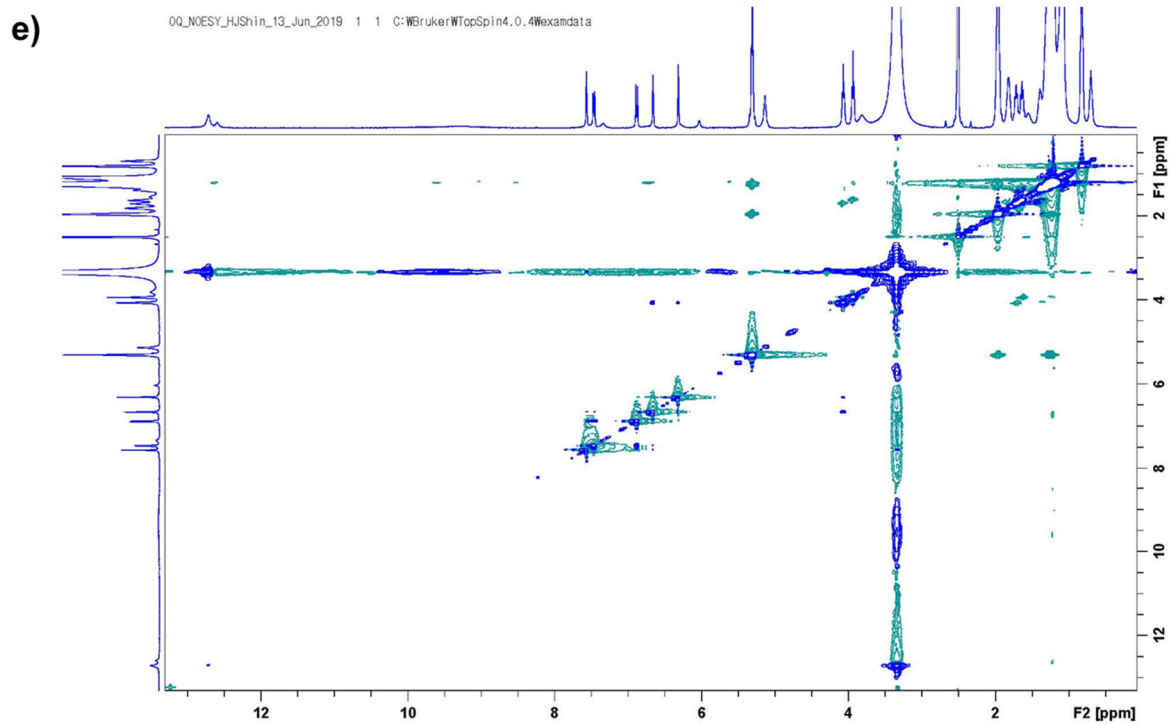

**Figure S2.** NMR spectroscopy of OQ synthesized and purified in this work. (a)  $^1\text{H}$ -NMR spectroscopy, (b)  $^{13}\text{C}$ -NMR spectroscopy, (c) 2D HMBC spectroscopy, (d) 2D HSQC spectroscopy, (e)  $^1\text{H}$ - $^1\text{H}$  NOESY spectroscopy. All peak assignments are described in the Materials and Methods.
